# Supplementary material for: Phosphate Restriction Promotes Longevity via Activation of Autophagy and the Multivesicular Body Pathway
Source: MDPI journal article supplement (doi:10.3390/cells10113161), 2021-11-13
Supplement: s1 [file s1]

# Supplemental Material

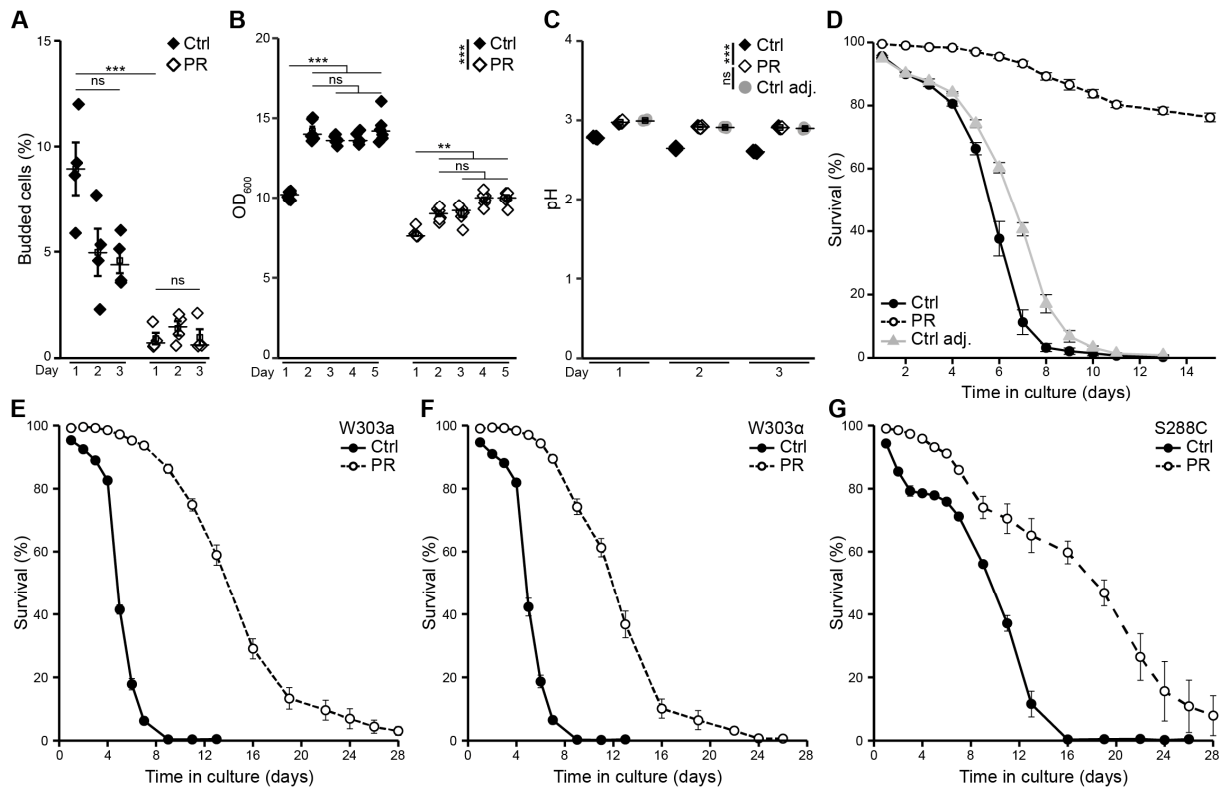

**Figure S1.** Phosphate exhaustion results in efficient entry into quiescence and longevity in different genetic backgrounds. (A) Quantification of budded WT cells cultured on standard medium (Ctrl) and phosphate-restricted medium (PR) for indicated days. Cells were manually counted, and percentage of budded cells is shown;  $n = 4$ , with at least 100 cells per experiment and condition. (B) Optical density (OD<sub>600</sub>) of WT cells cultured in Ctrl and PR media, determined at indicated time points during aging;  $n = 6$ . (C) Determination of culture media pH after WT cells have been cultured for indicated days on standard medium (Ctrl), phosphate-restricted medium (PR) and standard medium with pH adjustment to the media pH of PR cultures (Ctrl adj.). (D) Survival during chronological aging of WT cells cultured as described in (C). Survival was determined by flow cytometric analysis of PI staining;  $n = 5$ . (E-G) Survival of the yeast wild type strains W303a (E), W303α (F), and S288c (G) during chronological aging on Ctrl and PR medium. Survival was determined by flow cytometric analysis of PI staining at indicated days during aging;  $n=3-6$ . For statistical analysis, two-way ANOVA (A, B, C) was used. \*\* $p < 0.01$  and \*\*\* $p < 0.001$ ; ns not significant.

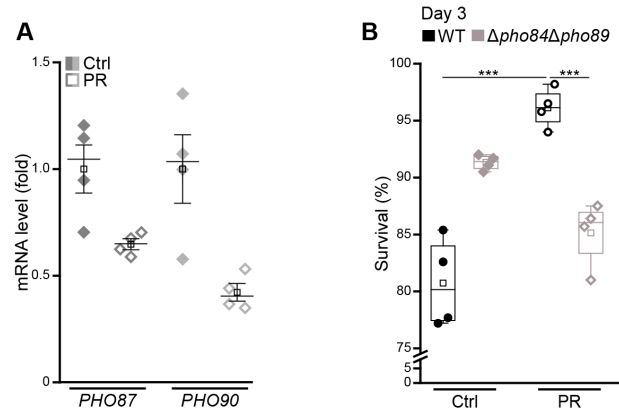

**Figure S2.** Gradual phosphate exhaustion leads to transcriptional downregulation of low-affinity phosphate transporters. **(A)** Quantification of *PHO87* and *PHO90* mRNA levels via RT-qPCR in WT cells grown for 24 h on standard (Ctrl) or phosphate restriction (PR) medium. Comparative CT method ( $\Delta\Delta$ CT method) was used to calculate the relative gene expression using *UBC6* as house-keeping gene;  $n = 4$ . **(B)** Survival of WT cells and cells lacking both high-affinity phosphate transporters ( $\Delta pho84\Delta pho89$ ) on day 3 of chronological aging on Ctrl or PR medium, corresponding to the survival curve shown in Fig. 1L;  $n = 4$ . For statistical analysis, one-way ANOVA followed by Tukey post hoc for multiple comparisons **(B)** was used. \*\*\* $p < 0.001$ .

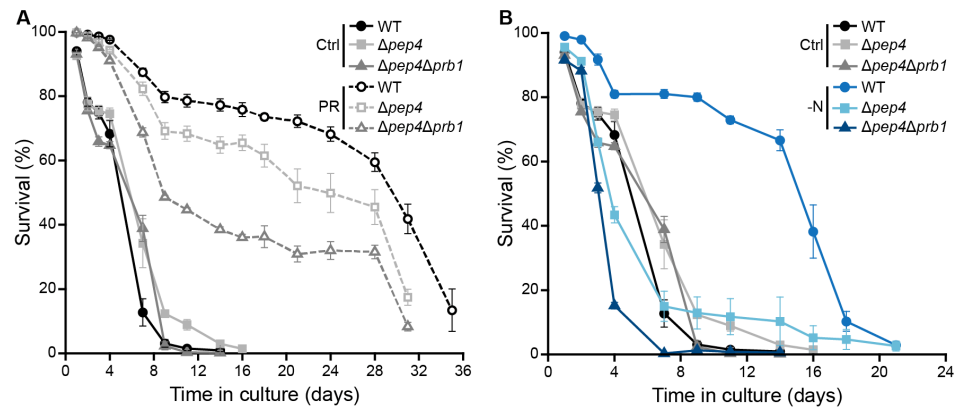

**Figure S3.** Simultaneous lack of the vacuolar proteases Pep4 and Prb1 impairs phosphate restriction-induced longevity. Survival during chronological aging, determined via flow cytometric quantification of PI staining, of WT,  $\Delta pep4$  and  $\Delta pep4\Delta prb1$  cells grown under different nutrient conditions: phosphate restriction (PR), nitrogen starvation (-N) and standard conditions (Ctrl). For clarity, survival curves are shown in two separate graphs for phosphate restriction **(A)** and nitrogen starvation **(B)**;  $n \geq 4$ .

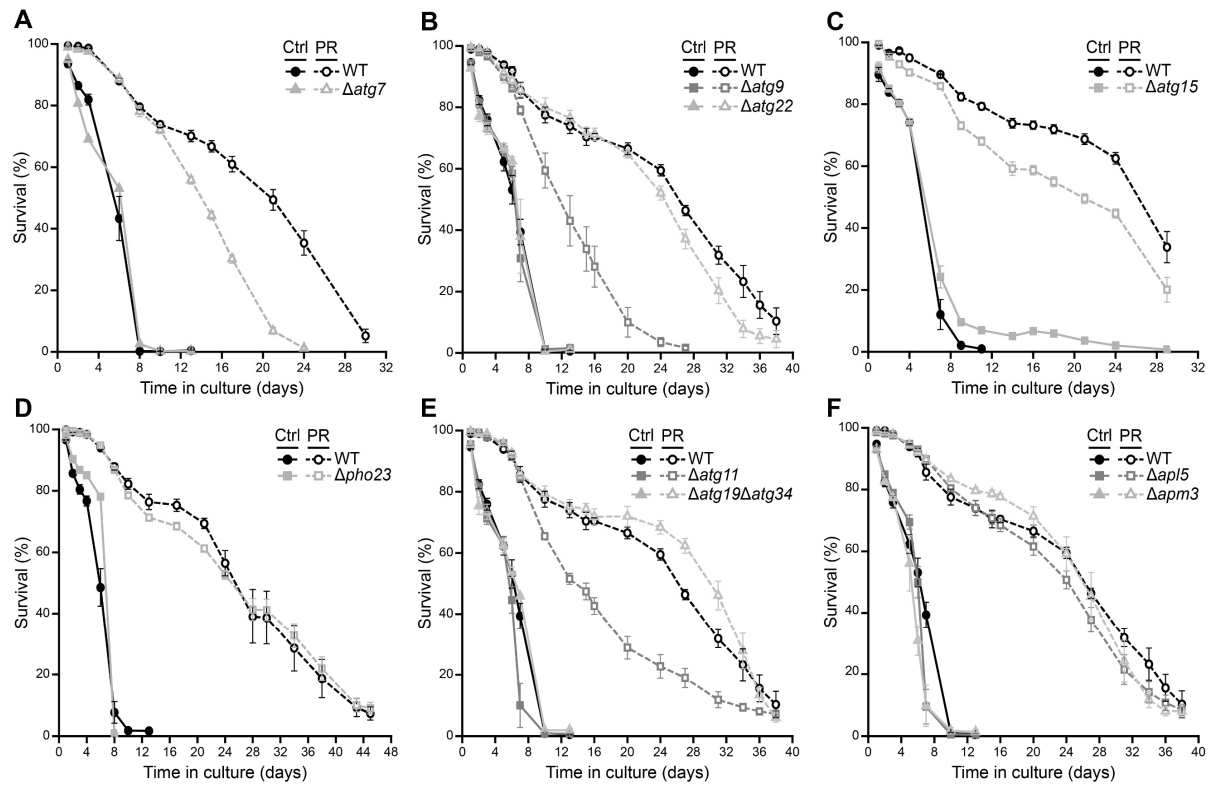

**Figure S4.** The core machinery of autophagy is required for full lifespan extension via phosphate restriction. Survival during chronological aging, determined via flow cytometric quantification of PI staining, of WT,  $\Delta atg7$  (A),  $\Delta atg9$ ,  $\Delta atg22$  (B),  $\Delta atg15$  (C),  $\Delta pho23$  (D),  $\Delta atg11$ ,  $\Delta atg19\Delta atg34$  (E), and  $\Delta apl5$  and  $\Delta apm3$  (F) cells grown on standard (Ctrl) or phosphate restriction (PR) medium;  $n \geq 4$ .

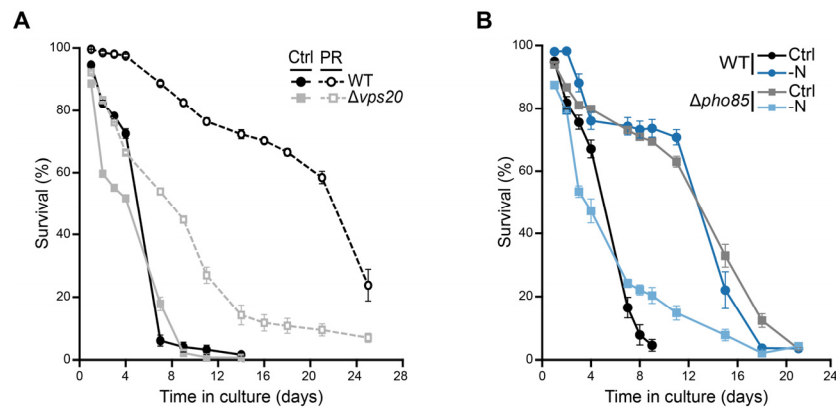

**Figure S5.** The MVB pathway and Pho85 are critical for survival upon nutrient limitation. Survival during chronological aging, determined via flow cytometric quantification of PI staining, of WT and  $\Delta vps20$  cells grown on standard (Ctrl) or phosphate-restricted (PR) medium;  $n \geq 4$  (A), as well as of WT and  $\Delta pho85$  cells grown on Ctrl or -N media;  $n = 4$  (B).

**Table S1.** Yeast strains used in this study.

| Strain                                                     | Genotype                                                                                                                                                   | Source     |
|------------------------------------------------------------|------------------------------------------------------------------------------------------------------------------------------------------------------------|------------|
| BY4742                                                     | MAT $\alpha$ , <i>his3</i> 1, <i>leu2</i> 0, <i>lys2</i> 0, <i>ura3</i> 0                                                                                  | Euroscarf  |
| W303a                                                      | MATa, <i>ade2-1</i> , <i>ura3-1</i> , <i>his3-11</i> , <i>trp1-1</i> , <i>leu2-3</i> , <i>leu2-112</i> ,<br><i>can1-100</i>                                |            |
| W303 $\alpha$                                              | MAT $\alpha$ , <i>ade2-1</i> , <i>ura3-1</i> , <i>his3-11</i> , <i>trp1-1</i> , <i>leu2-3</i> , <i>leu2-112</i> ,<br><i>can1-100</i>                       |            |
| S288C                                                      | MAT $\alpha$ , <i>SUC2</i> , <i>gal2</i> , <i>mal2</i> , <i>mel</i> , <i>flo1</i> , <i>flo8-1</i> , <i>hap1</i> , <i>ho</i> , <i>bio1</i> ,<br><i>bio6</i> |            |
| BY4742 Vph1 <sup>mCherry</sup>                             | BY4742 <i>VPH1</i> -mCherry-natNT2                                                                                                                         | This study |
| <i>pho84</i>                                               | BY4742 <i>pho84</i> ::hphNT1                                                                                                                               | This study |
| <i>pho89</i>                                               | BY4742 <i>pho89</i> ::hphNT1                                                                                                                               | This study |
| <i>pho84 pho89</i>                                         | BY4742 <i>pho84</i> ::hphNT1, <i>pho89</i> ::natNT2                                                                                                        | This study |
| <i>pho87</i>                                               | BY4742 <i>pho87</i> ::hphNT1                                                                                                                               | Euroscarf  |
| <i>pho90</i>                                               | BY4742 <i>pho90</i> ::hphNT1                                                                                                                               | Euroscarf  |
| <i>vtc1</i>                                                | BY4742 <i>vtc1</i> ::hphNT1                                                                                                                                | This study |
| <i>vtc2</i>                                                | BY4742 <i>vtc2</i> ::hphNT1                                                                                                                                | This study |
| <i>vtc3</i>                                                | BY4742 <i>vtc3</i> ::hphNT1                                                                                                                                | This study |
| <i>vtc4</i>                                                | BY4742 <i>vtc4</i> ::hphNT1                                                                                                                                | This study |
| <i>vtc5</i>                                                | BY4742 <i>vtc5</i> ::natNT2                                                                                                                                | This study |
| <i>vtc4 vtc5</i>                                           | BY4742 <i>vtc4</i> ::hphNT1, <i>vtc5</i> ::natNT2                                                                                                          | This study |
| BY4742 <sup>GFP</sup> Atg8                                 | BY4742 pATG8 ::natNT2-pATG8-EGFP                                                                                                                           | This study |
| BY4742 <sup>GFP</sup> Atg8<br>Vph1 <sup>Redstar</sup>      | BY4742 pATG8 ::natNT2-pATG8-EGFP, <i>VPH1</i> -Red-<br>star-kanMX                                                                                          | This study |
| <i>pep4</i>                                                | BY4742 <i>pep4</i> ::hphNT1                                                                                                                                | This study |
| <i>pep4 prb1</i>                                           | BY4742 <i>pep4</i> ::hphNT1, <i>prb1</i> ::kanMX                                                                                                           | This study |
| <i>atg1</i>                                                | BY4742 <i>atg1</i> ::hphNT1                                                                                                                                | This study |
| <i>atg4</i>                                                | BY4742 <i>atg4</i> ::hphNT1                                                                                                                                | This study |
| <i>atg7</i>                                                | BY4742 <i>atg7</i> ::hphNT1                                                                                                                                | This study |
| <i>atg8</i>                                                | BY4742 <i>atg8</i> ::hphNT1                                                                                                                                | This study |
| <i>atg9</i>                                                | BY4742 <i>atg9</i> ::hphNT1                                                                                                                                | This study |
| <i>atg11</i>                                               | BY4742 <i>atg11</i> ::hphNT1                                                                                                                               | This study |
| <i>atg15</i>                                               | BY4742 <i>atg15</i> ::hphNT1                                                                                                                               | This study |
| <i>atg22</i>                                               | BY4742 <i>atg22</i> ::hphNT1                                                                                                                               | This study |
| <i>atg19 atg34</i>                                         | BY4742 <i>atg19</i> ::hphNT1, <i>atg34</i> ::kanMX                                                                                                         | This study |
| <i>atg39</i>                                               | BY4742 <i>atg39</i> ::hphNT1                                                                                                                               | This study |
| <i>apl5</i>                                                | BY4742 <i>apl5</i> ::hphNT1                                                                                                                                | This study |
| <i>apm3</i>                                                | BY4742 <i>apm3</i> ::hphNT1                                                                                                                                | This study |
| <i>pho23</i>                                               | BY4742 <i>pho23</i> ::hphNT1                                                                                                                               | This study |
| BY4742 Sna3 <sup>GFP</sup>                                 | BY4742 <i>SNA3</i> -EGFP-kanMX                                                                                                                             | This study |
| BY4742 Sna3 <sup>GFP</sup><br>Vph1 <sup>mCherry</sup>      | BY4742 <i>SNA3</i> -EGFP-KanMX, <i>VPH1</i> -mCherry-natNT2                                                                                                | This study |
| <i>vps24</i>                                               | BY4742 <i>vps24</i> ::hphNT1                                                                                                                               | This study |
| <i>vps24 Sna3<sup>GFP</sup></i>                            | BY4742 <i>vps24</i> ::hphNT1, <i>SNA3</i> -yeGFP-kanMX                                                                                                     | This study |
| <i>vps24 Sna3<sup>GFP</sup></i><br>Vph1 <sup>mCherry</sup> | BY4742 <i>vps24</i> ::hphNT1, <i>SNA3</i> -yeGFP-kanMX, <i>VPH1</i> -<br>mCherry-natNT2                                                                    | This study |
| <i>vps4</i>                                                | BY4742 <i>vps4</i> ::hphNT1                                                                                                                                | This study |
| <i>vps20</i>                                               | BY4742 <i>vps20</i> ::hphNT1                                                                                                                               | This study |
| <i>atg1 vps24</i>                                          | BY4742 <i>atg1</i> ::kanMX, <i>vps24</i> ::kanMX                                                                                                           | Ralf Braun |
| <i>mon1</i>                                                | BY4742 <i>mon1</i> ::natNT2                                                                                                                                | This study |
| <i>ypt7</i>                                                | BY4742 <i>ypt7</i> ::hphNT1                                                                                                                                | This study |
| <i>rim15</i>                                               | BY4742 <i>rim15</i> ::hphNT1                                                                                                                               | This study |

|                                      |                                                   |            |
|--------------------------------------|---------------------------------------------------|------------|
| <i>pho80</i>                         | BY4742 <i>pho80</i> ::hphNT1                      | This study |
| <i>pho81</i>                         | BY4742 <i>pho81</i> ::hphNT1                      | This study |
| <i>pho85</i>                         | BY4742 <i>pho85</i> ::hphNT1                      | This study |
| BY4742 <sup>GFP</sup> Atg8           | BY4742 pATG8 ::natNT2-pATG8-EGFP,                 | This study |
| <i>pho85</i>                         | <i>pho85</i> ::hphNT1                             |            |
| BY4742 <sup>GFP</sup> Atg8           | BY4742 pATG8 ::natNT2-pATG8-EGFP,                 | This study |
| <i>pho85</i> Vph1 <sup>Redstar</sup> | <i>pho85</i> ::hphNT1, <i>VPH1</i> -Redstar-kanMX |            |

**Table S2.** Oligonucleotides used for gene deletion, chromosomal tagging and RT-qPCR.

| Modification                      | Oligonucleotides                                                                                                                                                                | PCR template                               |
|-----------------------------------|---------------------------------------------------------------------------------------------------------------------------------------------------------------------------------|--------------------------------------------|
| Deletion and tagging of genes     |                                                                                                                                                                                 |                                            |
| C-terminal tagging of <i>VPH1</i> | 5'-GAAGTACTTAAATGTTTCGCTTTTTTTTAAAGTCCTCAAAAT<br>TTAATCGATGAATTCGAGCTCG-3'<br>5'-GACATGGAAGTCGCTGTTGCTAGTGCAAGCTCTTCCGCTTC<br>AAGCCGTACGCTGCAGGTCGAC-3'                         | pYM42-mCherry-natNT2<br>[1]<br>pYM38 [2]   |
| Control PCR <i>VPH1</i> tagging   | 5'-CGAGCTCGAATTCATCGAT-3'<br>5'-GTATTCGAGGCCAATACTTG-3'                                                                                                                         |                                            |
| Deletion of <i>PHO84</i>          | 5'-CGTAGATCACCAGGGCACACAACAAACAAAACCTCCACGAA<br>TACAATCCAA ATG CGTACGCTGCAGGTCGAC-3'<br>5'-GTATTATTTGTTCTAGTTTACAAGTTTTAGTGCATCTTTG AG-<br>GCTTTTAATCGATGAATTCGAGCTCG-3'        | pFA6a-hphNT1<br>[2]                        |
| Control PCR <i>PHO84</i> deletion | 5'-CGTTCCTCTCACTGCCGCAC-3'<br>5'-GTCGACCTGCAGCGTACG-3'                                                                                                                          |                                            |
| Deletion of <i>PHO89</i>          | 5'-AATACTGGAGCGTATCTAATCGAATCAATATAAACAAAGATT<br>AAGCAAAA ATG CGTACGCTGCAGGTCGAC-3'<br>5'-TACCTAATGTTGTAACAACTG TATTCATAACCGAAACACATT<br>ATGATTAATCGATGAATTCGAGCTCG-3'          | pFA6a-hphNT1<br>[2]<br>pFA6a-natNT2<br>[2] |
| Control PCR <i>PHO89</i> deletion | 5'-GAATATACCGTACAAAGGAG-3'<br>5'-GTCGACCTGCAGCGTACG-3'                                                                                                                          |                                            |
| Deletion of <i>VTC1</i>           | 5'-CGATTTACTACATTATCGAATACGATTAACACTACGCC AGAT-<br>TTCCACAATATGCGTACGCTGCAGGTCGAC-3'<br>5'-GAAAATACAGTTTGTGCGTAACCCACGCTTACGATATT<br>GGAATTACAATTTCAATCGATGAATTCGAGCTCG-3'      | pFA6a-hphNT1<br>[2]                        |
| Control PCR <i>VTC1</i> deletion  | 5'-GGACCAGTTTATAAGAAGGT-3'<br>5'-GTCGACCTGCAGCGTACG-3'                                                                                                                          |                                            |
| Deletion of <i>VTC2</i>           | 5'-GTAGAAAGAACGACTACACCTCAACATAACGACACTT TTTT-<br>GACATG CGTACGCTGCAGGTCGAC-3'<br>5'-GCTACACATTACAAACATAAAAAACACATGGTCTCAGTAGA TA-<br>GAGTACATATTCTAATCGATGAATTCGAGCTCG-3'      | pFA6a-hphNT1<br>[2]                        |
| Control PCR <i>VTC2</i> deletion  | 5'-CTGGAAGGTATTTTCATCAG-3'<br>5'-GTCGACCTGCAGCGTACG-3'                                                                                                                          |                                            |
| Deletion of <i>VTC3</i>           | 5'-GGCTATTAGAGCGAACAGCAGAATTTGTCCTTGGTTTTCA GAG-<br>TTTGAAA ATGCGTACGCTGCAGGTCGAC-3'<br>5'-GATAGTAACTGGTACTTGTGTAATATATGTGTATATAAAAA AT-<br>ATACATGTTCTTAATCGATGAATTCGAGCTCG-3' | pFA6a-hphNT1<br>[2]                        |
| Control PCR <i>VTC3</i> deletion  | 5'-GGATGTTAATGAGTAACTTG-3'<br>5'-GTCGACCTGCAGCGTACG-3'                                                                                                                          |                                            |
| Deletion of <i>VTC4</i>           | 5'-GCTAACAATCAAATCGGCCAATAAAAGAGCATAACAAGGC AG-<br>GAACAGCTATGCGTACGCTGCAGGTCGAC-3'                                                                                             | pFA6a-hphNT1<br>[2]                        |

|                                   |                                                                                                                                                                                                                                                               |                     |
|-----------------------------------|---------------------------------------------------------------------------------------------------------------------------------------------------------------------------------------------------------------------------------------------------------------|---------------------|
| Control PCR <i>VTC4</i> deletion  | 5'-CTAATATGATTATTACTTAATTATACAGTAAAAAAACA<br>CGCTGTGTATTCAATCGATGAATTCGAGCTCG-3'<br>5'-TGTAAGCCAGTACCACAAG-3'<br>5'-GTCGACCTGCAGCGTACG-3'                                                                                                                     |                     |
| Deletion of <i>VTC5</i>           | 5'-TATCTCCATCTCAGCCCTAGGTAAGGATAGATACGAAGGG<br>TTGTACAATCATGCGTACGCTGCAGGTCGAC-3'<br>5'-CATATTTTATATAGACTGTACACATGAAAACTTTTATC<br>GTCCAAAATAATTAATCGATGAATTCGAGCTCG-3'                                                                                        | pFA6a-natNT2<br>[2] |
| Control PCR <i>VTC5</i> deletion  | 5'-CATTACACCCGTACGTAATC-3'<br>5'-GTCGACCTGCAGCGTACG-3'                                                                                                                                                                                                        |                     |
| Deletion of <i>ATG8</i>           | 5'-CTAATAATTGTAAAGTTGAGAAAATCATAATAAAATAATTACTA<br>GAGACATGCGTACGCTGCAGGTCGAC-3'<br>5'-CTATAATTTTCGATTTTAGATGTTAACGCTTCATTTCTTTT ATA-<br>TAAAAGACTAATCGATGAATTCGAGCTCG-3'<br>5'-CTAATAATTGTAAAGTTGAGAAAATCATAATAAAATAATTAC<br>TAGAGACATGCGTACGCTGCAGGTCGAC-3' | pFA6a-hphNT1<br>[2] |
| N-terminal tagging of <i>ATG8</i> | 5'-GACTCCGCCTTCCTTTTTTCAAATGGATATTCAGACTTAA<br>ATGTAGACTTCATCGATGAATTCTCTGTGCG-3'                                                                                                                                                                             | pYM-pATG8<br>[3]    |
| Control PCR <i>ATG8</i> deletion  | 5'-CTAACTGTCTCCACCGATAATG-3'<br>5'-GTCGACCTGCAGCGTACG-3'                                                                                                                                                                                                      |                     |
| Control PCR <i>ATG8</i> tagging   | 5'-GAACAATAGATGGCTAATGAGTCC-3'<br>5'-GGTTATGGTGTCAATGTTTTGC-3'                                                                                                                                                                                                |                     |
| Deletion of <i>PEP4</i>           | 5'-GTGACCTAGT ATTTAATCCA AATAAAATTC AAACAAAAAC<br>CAAACTAAC ATG CGTACGCTGCAGGTCGAC-3'<br>5'-CTAGATGGCAGAAAAGGATAGGGCGGAGAAGTAAGAAAAGT<br>TTAGCTCA ATCGATGAATTCGAGCTCG-3'                                                                                      | pFA6a-hphNT1<br>[2] |
| Control PCR <i>PEP4</i> deletion  | 5'-CATAATCCTGCTTGATGTGG-3'<br>5'-GTCGACCTGCAGCGTACG-3'                                                                                                                                                                                                        |                     |
| Deletion of <i>PRB1</i>           | 5'-ATCGCCAATAAAAAAACAACTAAACCTAATTCTAACAA<br>GCAAAGCAGCTGAAGCTTCGTACGC-3'<br>5'-CGCCTAAGGAAAGAAAAAGAAAAAAAGCAGCTGAA<br>ATTTTCTAAATGAAGAAGCATAGGCCACTAGTGGATCTG-3'                                                                                             | pUG6<br>[4]         |
| Control PCR <i>PRB1</i> tagging   | 5'-GAGATGGACGAGAAACAGGG-3'<br>5'-GCGTACGAAGCTTCAGCTG-3'                                                                                                                                                                                                       |                     |
| Deletion of <i>ATG1</i>           | 5'-ACCCCATATTTTCAAATCTCTTTTACAACACCAGACGAGA<br>AATTAAGAAAATGCGTACGCTGCAGGTCGAC-3'<br>5'-ATATAGCAGGTCATTTGTACTTAATAAGAAAACCATATTATG<br>CATCACTTAATCGATGAATTCGAGCTCG-3'                                                                                         | pFA6a-hphNT1<br>[2] |
| Control PCR <i>ATG1</i> deletion  | 5'-GTAATGTAAGGAAAACCCAC-3'<br>5'-GTCGACCTGCAGCGTACG-3' '                                                                                                                                                                                                      |                     |
| Deletion of <i>ATG4</i>           | 5'-GTTAGTAGATGAAGAATGGACGACTTCTTATCACGTATAGG AG-<br>TGATATACATGCGTACGCTGCAGGTCGAC-3'<br>5'-GAATATATTAAAAACAAGTATATATGCTTATGAACTAGTGAA<br>TTCCTTACACTAATCGATGAATTCGAGCTCG-3'                                                                                   | pFA6a-hphNT1<br>[2] |
| Control PCR <i>ATG4</i> deletion  | 5'-CGCCTACATCATCAAGATCAC-3'<br>5'-GTCGACCTGCAGCGTACG-3'                                                                                                                                                                                                       |                     |
| Deletion of <i>ATG7</i>           | 5'-ATAACTAAAGTTCATTATATTTCAACAAATATAAGATAAT CAA-<br>GAATAAAATGCGTACGCTGCAGGTCGAC-3'<br>5'-CGGAAAGTGGCACCACAATATGTACCAATGCTATTATATGC<br>AAAATATTAATCGATGAATTCGAGCTCG-3'                                                                                        | pFA6a-hphNT1<br>[2] |

|                                   |                                                                                                                                                                            |                     |
|-----------------------------------|----------------------------------------------------------------------------------------------------------------------------------------------------------------------------|---------------------|
| Control PCR <i>ATG7</i> deletion  | 5'-TGGAACGTGCAGAAAAGGAC -3'<br>5'-GTCGACCTGCAGCGTACG-3'                                                                                                                    |                     |
| Deletion of <i>ATG9</i>           | 5'-GACATTTAAGAACAGCCTGAAATATCAAAATCACGGAATTAT<br>TAGGTTATGCGTACGCTGCAGGTCGAC-3'<br>5'-CAGTTATATATATAGTTATATTGGATGATGTACACGACAC AG-<br>TCTGCCTTAATCGATGAATTCGAGCTCG-3'      | pFA6a-hphNT1<br>[2] |
| Control PCR <i>ATG9</i> deletion  | 5'-CGAGCTCGAATTCATCGAT-3'<br>5'-TGCAAAGATGGCTCATATTG-3'                                                                                                                    |                     |
| Deletion of <i>ATG11</i>          | 5'-GTGTACTGTTGTTGTTTCGGAAAGTACTTCTTTATTTTCT TTTATA-<br>CATCATGCGTACGCTGCAGGTCGAC-3'<br>5'-GATACATAATTAATAATCTTGTCAATTTGTGACAAACGTTTAGCA<br>CTGTTCAATCGATGAATTCGAGCTCG-3'   | pFA6a-hphNT1<br>[2] |
| Control PCR <i>ATG11</i> deletion | 5'-GCTAGCATTTCCTATATATCC-3'<br>5'-GTCGACCTGCAGCGTACG-3'                                                                                                                    |                     |
| Deletion of <i>ATG15</i>          | 5'-AACTGATCTAGGCATTACAATTAAGGAAACAAGGGAAAT<br>ATTCTATTGAATGCGTACGCTGCAGGTCGAC-3'<br>5'-CGCATAGGCCCTAAAACAACACTAGGGTCATAATAGATGT<br>ATGGGTCTTAATCGATGAATTCGAGCTCG-3'        | pFA6a-hphNT1<br>[2] |
| Control PCR <i>ATG15</i> deletion | 5'-TATAATAAGCATAACATCGG-3'<br>5'-GTCGACCTGCAGCGTACG-3'                                                                                                                     |                     |
| Deletion of <i>ATG22</i>          | 5'-GCCCTTATAAGCAATAGTTTGCTCATAACATATTCTCTA CATT-<br>AGATATG CGTACGCTGCAGGTCGAC-3'<br>5'-CCTTATATATATACGTAAGCAAAGTTTTATGTAACAAA<br>AAAAAAAAAAGAATAATCGATGAATTCGAGCTCG-3'    | pFA6a-hphNT1<br>[2] |
| Control PCR <i>ATG22</i> deletion | 5'-GTTAATCATCCTCCAGCAAAGC-3'<br>5'-GTCGACCTGCAGCGTACG-3'                                                                                                                   |                     |
| Deletion of <i>ATG19</i>          | 5'-GGTAATTGCGGCGGCACCTTGCTTCAGTAACGCCCAA AGGAGAG-<br>TTCTGGTAAATGCGTACGCTGCAGGTCGAC-3'<br>5'-GTGTATGTGAAAAGGTACTCATTGCTGTATAAAAA TAGAGTTT-<br>GACCTAATCGATGAATTCGAGCTCG-3' | pFA6a-hphNT1<br>[2] |
| Control PCR <i>ATG19</i> deletion | 5'-CGCGTTCCATTTGAGAAAGC-3'<br>5'-GTCGACCTGCAGCGTACG-3'                                                                                                                     |                     |
| Deletion of <i>ATG34</i>          | 5'-GTTAAATAAGTACTATAGCCAAAGAACTGGAAGAATA<br>TAAAAAAGCATGCATAGGCCACTAGTGGATCTG-3'<br>5'-GAAACTAGTTCCTATAGGTTGAGTGTCTATCAAA AATTTACGGA-<br>GACGCGCAGCTGAAGCTTCGTACGC-3'      | pUG6<br>[4]         |
| Control PCR <i>ATG34</i> deletion | 5'-GGTCGTATCCTTTTCGACAGTG-3'<br>5'-GCGTACGAAGCTTCAGCTG-3'                                                                                                                  |                     |
| Deletion of <i>ATG39</i>          | 5'-GCAGTGACGATAATAGAGACTAGTAAAACAGTCGAGTTGT<br>CGGACCTAAAATGCGTACGCTGCAGGTCGAC-3'<br>5'-CGTTTTTTTTTCTTTTGTTAATTTTCATTCTTCATGCTGGGTT<br>TTGGATGATCTAATCGATGAATTCGAGCTCG-3'  | pFA6a-hphNT1<br>[2] |
| Control PCR <i>ATG39</i> deletion | 5'-GCTGCATATTTGCTTTTCGCCG-3'<br>5'-GTCGACCTGCAGCGTACG-3'                                                                                                                   |                     |
| Deletion of <i>APL5</i>           | 5'-CTGAAGTGGG AAAGGCAGTTGCCACAACCAGAAGAGCATA<br>ACATATTGTCATGCGTACGCTGCAGGTCGAC-3'<br>5'-TACGTACGTAATCGCTGTCATTGAGAATTCACGACTTCG<br>ATTTTTTTATCGTTAATCGATGAATTCGAGCTCG-3'  | pFA6a-hphNT1<br>[2] |
| Control PCR <i>APL5</i> deletion  | 5'-CGAAGCTTTTCATCCTAACGAAC-3'<br>5'-GTCGACCTGCAGCGTACG-3'                                                                                                                  |                     |
| Deletion of <i>APM3</i>           | 5'-GACTTGGGCA ACAACAGAGGCTGTAAACCTTACCAACCCA AC-<br>CAAAATAG ATGCGTACGCTGCAGGTCGAC-3'                                                                                      | pFA6a-hphNT1<br>[2] |

|                                   |                                                                                                                                                                       |                     |
|-----------------------------------|-----------------------------------------------------------------------------------------------------------------------------------------------------------------------|---------------------|
| Control PCR <i>APM3</i> deletion  | 5'-TCATTATATTCTATTTAGTTTCGCATGGAATTTCAAGTA CACATA-TAACTAATCGATGAATTCGAGCTCG-3'<br>5'-CAGTAATTGCATTACAAACCTGTG-3'<br>5'-GTCGACCTGCAGCGTACG-3'                          |                     |
| Deletion of <i>PHO23</i>          | 5'-CTTGCAGTATCACAAACAGCAACCACGTTCATAGTCTGAAATACGTACAAATGCGTACGCTGCAGGTCGAC-3'<br>5'-GTATTTAGTAGATATTTTCCTTAAGGCGATATTCGCCCCGAG AGC-TATTTCAATCGATGAATTCGAGCTCG-3'      | pFA6a-hphNT1<br>[2] |
| Control PCR <i>PHO23</i> deletion | 5'-ATCAGGCGCCTTAGACCGCT-3'<br>5'-GTCGACCTGCAGCGTACG-3'                                                                                                                |                     |
| C-terminal tagging of <i>SNA3</i> | 5'-CGATGTGCCCTTGATGGACAACAAACAACAGCTCTCTTCCGGCCGTACTCGTACGCTGCAGGTCGAC-3'<br>5'-CTCTATGTGTTATTTAGAACTACGGTGATAAAGAGCTCGTTCCGATCACTAATCGATGAATTCGAGCTCG-3'             | pYM27<br>[2]        |
| Control PCR <i>SNA3</i> tagging   | 5'-GTCGACCTGCAGCGTACG-3'<br>5'-GCACGTGATG AAGGCTCGTT-3'                                                                                                               |                     |
| Deletion of <i>VPS24</i>          | 5'-ACCTTTAGTAGTTTGGGGGGCAGTTTTCTGGGCAATACAAAGTTTA CTTTTGATGCGTACGCTGCAGGTCGAC-3'<br>5'-CATTATTTATTCACTTATTTATTTATTTTCTTTGTACAGTCACAGTAACACTCTAATCGATGAATTCGAGCTCG-3'  | pFA6a-hphNT1<br>[2] |
| Control PCR <i>VPS24</i> deletion | 5'-CGCAACTCCCACTCCCAATA-3'<br>5'-GTCGACCTGCAGCGTACG-3'                                                                                                                |                     |
| Deletion of <i>VPS4</i>           | 5'-ATGGAAGACAAAAATAAAGCAGCATAGAGTGCCTATAGTAGATGGG GTACAAATGCGTACGCTGCAGGTCGAC-3'<br>5'-TTTTTTATTTTCATGTACACAAGAAATCTACATTAGCACGTTAATCAATTGACTAATCGATGAATTCGAGCTCG-3'  | pFA6a-hphNT1<br>[2] |
| Control PCR <i>VPS4</i> deletion  | 5'-CAGTCGCGCCAACGACCAGT-3'<br>5'-GTCGACCTGCAGCGTACG-3'                                                                                                                |                     |
| Deletion of <i>VPS20</i>          | 5'-ATAGTACAGACTGCTGAATTA ACTCCACTT GGTGCTTTTG TATA-TATCGA ATG CGTACGCTGCAGGTCGAC-3'<br>5'-CTATTTACATTCCCTTTATTTTTTAATTTTGAAGCTACATACAGACATTCA ATCGATGAATTCGAGCTCG-3'  | pFA6a-hphNT1<br>[2] |
| Control PCR <i>VPS20</i> deletion | 5'-GAGGGGTTCTCTAACGCTGT-3'<br>5'-GTCGACCTGCAGCGTACG-3'                                                                                                                |                     |
| Deletion of <i>MON1</i>           | 5'-GAATAAAAAAGTCTATCAAAGTACACAAACGTAGAATCAGTACATCGGAACTATGCGTACGCTGCAGGTCGAC-3'<br>5'-GATATATTTACAAATTAAGGAAAAAATAATAAAATAACCTCCCTGTACAAAGTTAATCGATGAATTCGAGCTCG-3'   | pFA6a-natNT2<br>[2] |
| Control PCR <i>MON1</i> deletion  | 5'-CGAAAAGCAGTTCAAGCTCAC-3'<br>5'-GTCGACCTGCAGCGTACG-3'                                                                                                               |                     |
| Deletion of <i>YPT7</i>           | 5'-CCACTTCTTATCCATATAGA AACCCCTTCTGTATCAATCAAATTAAGTGATGCGTACGCTGCAGGTCGAC-3'<br>5'-AAGGATACGCTATAAAGGATTACATAATAGAAGATACAATAAGTAGTACAGCTCAATCGATGAATTCGAGCTCG-3'     | pFA6a-hphNT1<br>[2] |
| Control PCR <i>YPT7</i> deletion  | 5'-TATATACGGGCAGTCCGTA-3'<br>5'-GTCGACCTGCAGCGTACG-3'                                                                                                                 |                     |
| Deletion of <i>RIM15</i>          | 5'-TTTCTCTTGCCTCATTGATAGAATAGATAAGCCCAGTAGAGGAAGACAGATGCGTACGCTGCAGGTCGAC-3'<br>5'-TTTCAAGCAAAGTTTTTATTCAGTTATTTTTTTTAATTATCTTTATCTTAAAATTTATCAATCGATGAATTCGAGCTCG-3' | pFA6a-hphNT1<br>[2] |



|                                   |                                                                                                                                                                                              |                     |
|-----------------------------------|----------------------------------------------------------------------------------------------------------------------------------------------------------------------------------------------|---------------------|
| Control PCR <i>RIM15</i> deletion | 5'-CTAATATATAGTGAATGTAGGGAGC-3'<br>5'-GTCGACCTGCAGCGTACG-3'                                                                                                                                  |                     |
| Deletion of <i>PHO80</i>          | 5'-CAAATTTAAGTCTGCAAGCTATCATAAGACGAGGATATCC TTT-<br>GGAGACTCATAGAAATCATGCGTACGCTGCAGGTCGAC-3'<br>5'-TGGAAAGTTTTAATTTTGTCTCAATCATGATTGCTTTCA TAA-<br>TACCCACGAAAAATCATTATCGATGAATTCGAGCTCG-3' | pFA6a-hphNT1<br>[2] |
| Control PCR <i>PHO80</i> deletion | 5'-TTAACGAATTATGGTATTCT-3'<br>5'-GTCGACCTGCAGCGTACG-3'                                                                                                                                       |                     |
| Deletion of <i>PHO81</i>          | 5'-CTTTTTGAGAGAATAACCCCTTTGGAGGCAACATAGATAGA<br>TAAACGTGCAATGCGTACGCTGCAGGTCGAC-3'<br>5'-AAAAGTTTTTCCTAAATAATGTATAAGATTTCAAA AC-<br>TACATATTACAGAACTTTAATCGATGAATTCGAGCTCG-3'                | pFA6a-hphNT1<br>[2] |
| Control PCR <i>PHO81</i> deletion | 5'-CTAATTGCATCAGCCTATCTTTC-3'<br>5'-GTCGACCTGCAGCGTACG-3'                                                                                                                                    |                     |
| Deletion of <i>PHO85</i>          | 5'-CAGATAAGGGATATATAGCGCGGCAAAC TTAGAG-<br>CAATACCAATGCGTACGCTGCAGGTCGAC-3'<br>5'-ATTATTATCATTATATATACATGGCTACGGTTTTTCGCT GAC-<br>GGGCTGCGTTAATCGATGAATTCGAGCTCG-3'                          | pFA6a-hphNT1<br>[2] |
| Control PCR <i>PHO85</i> deletion | 5'-GTCATTGTTGAGAGAAAGGAG-3'<br>5'-GTCGACCTGCAGCGTACG-3'                                                                                                                                      |                     |
| <b>RT-qPCR</b>                    |                                                                                                                                                                                              |                     |
| <i>PHO84</i>                      | 5'-AGCTTGGGGTCAAATCTCCG-3'<br>5'-TCAGCACCAGAGTTTGCGTA-3'                                                                                                                                     |                     |
| <i>PHO89</i>                      | 5'-CCAGTGCTTTGATTGGCTCG-3'<br>5'-GCGCCAATTGTACCACCAAC-3'                                                                                                                                     |                     |
| <i>PHO87</i>                      | 5'-ATGGGGTTGGCTTCATCTGG-3'<br>5'-AGCGCCTACAGTTAGCCATC-3'                                                                                                                                     |                     |
| <i>PHO90</i>                      | 5'-GTGGGTACTTTTCGTCTCGCA-3'<br>5'-TAGGAGCAGCTTTGGGGTTG-3'                                                                                                                                    |                     |
| <i>UBC6</i>                       | 5'-GGACGTTTCAAGCCCAACAC-3'<br>5'-TGAGACAGACCAGCCAGGAT-3'                                                                                                                                     |                     |

## References

1. Tosal-Castano, S.; Peselj, C.; Kohler, V.; Habernig, L.; Berglund, L.L.; Ebrahimi, M.; Vögtle, F.-N.; Höög, J.; Andréasson, C.; Büttner, S. Snd3 Controls Nucleus-Vacuole Junctions in Response to Glucose Signaling. *Cell Rep.* **2021**, *34*, 108637, doi:10.1016/j.celrep.2020.108637.
2. Janke, C.; Magiera, M.M.; Rathfelder, N.; Taxis, C.; Reber, S.; Maekawa, H.; Moreno-Borchart, A.; Doenges, G.; Schwob, E.; Schiebel, E.; et al. A Versatile Toolbox for PCR-Based Tagging of Yeast Genes: New Fluorescent Proteins, More Markers and Promoter Substitution Cassettes. *Yeast* **2004**, *21*, 947–962, doi:10.1002/yea.1142.
3. Eisenberg, T.; Schroeder, S.; Andryushkova, A.; Pendl, T.; Küttner, V.; Bhukel, A.; Mariño, G.; Pietrocola, F.; Harger, A.; Zimmermann, A.; et al. Nucleocytoplasmic Depletion of the Energy Metabolite Acetyl-Coenzyme A Stimulates Autophagy and Prolongs Lifespan. *Cell Metab.* **2014**, *19*, 431–444, doi:10.1016/j.cmet.2014.02.010.
4. Guedener, U.; Heinisch, J.; Koehler, G.J.; Voss, D.; Hegemann, J.H. A Second Set of LoxP Marker Cassettes for Cre-Mediated Multiple Gene Knockouts in Budding Yeast. *Nucleic Acids Res.* **2002**, *30*, e23.
